# **A robust mean and variance test with application to epigenome-wide association studies**

James R Staley<sup>1</sup>, Frank Windmeijer<sup>1,2</sup>, Matthew Suderman<sup>1</sup>, George Davey Smith<sup>1</sup> and Kate Tilling<sup>1,\*</sup>.

<sup>1</sup>MRC Integrative Epidemiology Unit, Population Health Sciences, Bristol Medical School, University of Bristol, Bristol, UK.

<sup>2</sup>Department of Economics, University of Bristol, Bristol, UK.

\*Corresponding author.

Conflicts of interest: None

Correspondence:

Prof Kate Tilling

MRC Integrative Epidemiology Unit, Population Health Sciences, Bristol Medical School, University of Bristol, Bristol, BS8 2BN, UK.

Email: [kate.tilling@bristol.ac.uk](mailto:kate.tilling@bristol.ac.uk)

Telephone: +44 (0)117 331 0098

## 1 **Abstract**

2 **Background:** Most studies of high-dimensional phenotypes focus on assessing differences in  
3 mean levels (location) of the phenotype by exposure, e.g. epigenome-wide association studies  
4 of the effect of exposure on mean DNA methylation at CpG sites. However, identifying  
5 effects on the variability (scale) of these outcomes could provide additional insights into  
6 biological mechanisms.

7 **Methods:** We introduce a scale test, based on the Brown-Forsythe test, for analysing  
8 phenotype variability for both categorical and continuous exposures. We also present a novel  
9 joint location-and-scale score test (JLSsc). These tests were compared to the equivalent  
10 likelihood-ratio tests and alternative approaches in simulations and used to test associations of  
11 mean and variability of DNA methylation with gender and gestational age using data from the  
12 Accessible Resource for Integrated Epigenomics Studies (ARIES).

13 **Results:** The extended Brown-Forsythe test and JLSsc had good statistical properties for both  
14 categorical and continuous exposures, without requiring transformation of the methylation  
15 levels. All of the other methods assessed had inflated type I error using the raw methylation  
16 levels. In ARIES, JLSsc identified 7228 and 340 CpG sites (240 CpGs were associated with  
17 methylation variability differences between males and females using the extended Brown-  
18 Forsythe test) that were associated with either mean or variability in gender and gestational  
19 age in cord blood, respectively.

20 **Conclusions:** The extended Brown-Forsythe test and JLSsc are robust tests of variability and  
21 combined mean and variability effects, respectively. These tests can be used to detect  
22 associations not solely driven by a mean effect of the exposure on the outcome.

## 1 **Introduction**

2 Most investigations into health-related phenotypes have focused on determining whether an  
3 exposure affects the mean of a phenotype (location test). However, assessing whether an  
4 exposure affects the variability of a phenotype (scale test) could also provide insight into the  
5 biological mechanisms that control phenotypic variation and disease pathogenesis as well as  
6 identify possible interactions (1-3). Furthermore, the potential of combining a location test  
7 with a scale test has yet to be fully explored (joint location-and-scale test), especially in the  
8 context of high-dimensional phenotypes where these tests could be used to improve power as  
9 well as to identify markers involved in interactions (4). One example where these approaches  
10 could be particularly useful is for epigenome-wide association studies (EWAS), where DNA  
11 methylation at CpG (cytosine followed by a guanine) sites across the genome are tested for  
12 association with an exposure (Supplementary Text) (5,6).

13 A range of statistical tests have been developed to test whether an exposure affects variability  
14 of an outcome, specifically in the context of evaluating variability differences for a  
15 continuous variable between groups of individuals (7). Li *et al.* (8) compared approaches for  
16 assessing methylation variability in the EWAS setting, and showed that the Brown-Forsythe  
17 test (9) performed well compared to alternative approaches. Since this test can be re-  
18 formulated in a regression framework (10,11), it can be extended to continuous exposures.  
19 Methods for jointly testing mean and variability have also been proposed (4,10-15), although  
20 these approaches are either limited by sensitivity to distributional assumptions or are  
21 restricted to binary exposures.

22 Here, we introduce two approaches: an extension (to continuous exposures) of the Brown-  
23 Forsythe test of variability and a joint location-and-scale test, which can be used for both  
24 continuous and categorical exposures. We performed a simulation study to compare these

1 approaches to alternative tests, and then applied these modelling approaches to investigate the  
2 effect of gender and gestational age on cord blood DNA methylation mean and variability.

### 3 **Methods**

#### 4 **Modelling approaches**

##### 5 *Location tests*

6 Ordinary least squares (OLS) regression is commonly used in EWAS to assess mean  
7 differences in methylation by an exposure. That is,

$$y_i = \alpha + x_i' \beta + \epsilon_i, i = 1, \dots, n, \quad [1]$$

8 where  $y_i$  is the outcome for the  $i$ -th individual (usually DNA methylation levels in EWAS),  
9  $x_i$  is the exposure(s) for the  $i$ -th individual and  $\epsilon_i \sim N(0, \sigma_\epsilon^2)$ . OLS regression is known to be  
10 relatively robust to the underlying assumptions related to the residuals when estimating the  
11 regression coefficients (discussed further in the Supplementary Text).

##### 12 *Scale tests*

13 There are several statistical tests for assessing variability differences of continuous outcome  
14 by a categorical exposure (7). Bartlett's test (16) is perhaps the most well-known of these tests  
15 (Supplementary Text) and has been applied in the EWAS setting (3,17). However, this test is  
16 known to be very sensitive to outliers and non-normality of the outcome, which is a major  
17 cause of concern when analysing DNA methylation. The Brown-Forsythe test (9), on the  
18 other hand, is robust to non-normality of the outcome and outliers (8). This test is essentially a  
19 one-way analysis of variability of the variable  $z_{ij} = |y_{ij} - \tilde{y}_j|$ , where  $y_{ij}$  is the methylation  
20 of the  $i$ -th individual in the  $j$ -th group and  $\tilde{y}_j$  is the median of the  $j$ -th group. Let  
21  $y_{ij} \sim (\mu_j, \sigma_j^2)$ , where  $\mu_j$  and  $\sigma_j^2$  are the mean and variance of  $y_{ij}$  in the  $j$ -th group, then the test  
22 statistic for  $H_0: \sigma_1^2 = \sigma_2^2 = \dots = \sigma_k^2$  is given by

$$BF = \frac{(n - k) \sum_{j=1}^k n_j (\bar{z}_j - \bar{z})^2}{(k - 1) \sum_{j=1}^k \sum_{i=1}^{n_j} (z_{ij} - \bar{z}_j)^2} \sim F_{k-1, n-k}, \quad [2]$$

1 where  $k$  is the number of groups,  $n_j$  is the number of individuals in the  $j$ -th group and  $\bar{z}_j$  and  
2  $\bar{z}$  are the group mean and overall mean of  $z_{ij}$ , respectively.

3 The Brown-Forsythe test can be re-formulated as a two-stage approach (10,11):

4 (i) Obtain the absolute values of the residuals from a least absolute deviation regression,

5 
$$d_i = |y_i - (\hat{\alpha} + x_i' \hat{\beta})|.$$

6 (ii) Test for an association between the  $d_i$ 's and  $x_i$ 's using a regression  $F$ -test.

7 Since this regression framework does not depend on the exposure ( $x_i$ ) being categorical, it  
8 can also be applied to continuous exposures. Indeed, this approach has the same structure as  
9 the Glejser and Bresuch-Pagan tests of heteroskedasticity (18,19).

### 10 ***Joint location-and-scale tests***

11 If the data are symmetrically distributed then the  $p$ -values from the location and scale tests are  
12 independent and can be combined using Fisher's method (JLSp) (10,11). However, as DNA  
13 methylation at CpG sites is often asymmetrically distributed, these  $p$ -values are likely be  
14 correlated for most CpG sites. Other alternative approaches for jointly testing for mean and  
15 variability effects include likelihood-ratio tests (LRT) comparing linear mixed models with  
16 and without including a fixed-effect and random-effect for the exposure (LRTmv) and double  
17 generalized linear mixed models (DGLM) (13,14,20) (further details in Supplementary Text).  
18 However, these tests are also sensitive to deviations from normality and outlying values (13).

19 To alleviate some of the issues involved in testing for mean and variability effects  
20 simultaneously, we have developed a joint location-and-scale score test (JLSsc). This  
21 approach essentially combines a location test and scale test, while accounting for the

- 1 correlation between these tests. We propose to test the joint null hypothesis  $H_0: \beta = \delta = 0$  in  
 2 the model specification:

$$y_i = \alpha + x_i' \beta + \varepsilon_i$$

$$(y_i - \bar{y})^2 = \lambda + x_i' \delta + u_i, \quad [2]$$

- 3 where  $x_i$  is a  $(k_x)$  vector of exposures and  $\bar{y}$  is the sample average of  $y_i$ . The first part,  
 4  $H_0: \beta = 0$ , is the null that  $x$  does not affect the mean of  $y$ . The second part,  $H_0: \delta = 0$ , is the  
 5 null that  $x$  does not affect the variability of  $y$ .

- 6 Let  $\tilde{y}_i = y_i - \bar{y}$ ,  $\tilde{x}_i = x_i - \bar{x}$  and  $\tilde{d}_i = \tilde{y}_i^2 - \hat{\sigma}^2$ , where  $\hat{\sigma}^2 = \frac{1}{n} \sum_{i=1}^n \tilde{y}_i^2$ . Further, let the  
 7  $n \times k_x$  matrix  $\tilde{X} = [\tilde{x}_i']$  and the  $n$  vectors  $\tilde{y} = (\tilde{y}_i)$  and  $\tilde{d} = (\tilde{d}_i)$ . Then the OLS estimators  
 8 for  $\beta$  and  $\delta$  are given by

$$\hat{\beta} = (\tilde{X}' \tilde{X})^{-1} \tilde{X}' \tilde{y}$$

$$\hat{\delta} = (\tilde{X}' \tilde{X})^{-1} \tilde{X}' \tilde{d}. \quad [3]$$

- 9 Let  $\theta = \begin{pmatrix} \beta \\ \delta \end{pmatrix}$ ,  $\hat{\theta} = \begin{pmatrix} \hat{\beta} \\ \hat{\delta} \end{pmatrix}$  and  $\hat{\Sigma} = \frac{1}{n} \sum_{i=1}^n \begin{bmatrix} \tilde{y}_i^2 & \tilde{y}_i \tilde{d}_i \\ \tilde{y}_i \tilde{d}_i & \tilde{d}_i^2 \end{bmatrix}$ . The estimator for the variance of  $\hat{\theta}$   
 10 under the null that  $\beta = \delta = 0$  and the additional assumption that the conditional skewness  
 11 and kurtosis of  $y_i$  do not vary with the values of  $x_i$ , is then given by

$$V \hat{a}r(\hat{\theta}) = \hat{\Sigma} \otimes (\tilde{X}' \tilde{X})^{-1}. \quad [4]$$

- 12 Hence, the score test for  $H_0: \beta = \delta = 0$  or  $H_0: \theta = 0$ , is given by

$$S = \hat{\theta}' \left( \hat{\Sigma}^{-1} \otimes (\tilde{X}' \tilde{X}) \right) \hat{\theta} \xrightarrow{d} \chi_{2k_x}^2. \quad [5]$$

1 Other covariates are regressed out of both the outcome and exposure variables by taking  
2 residuals from OLS regression prior to analysis with JLSsc. Further details of JLSsc are  
3 discussed in the Supplementary Text.

4 We have developed an R package to perform these tests available at:  
5 <https://github.com/jrs95/jlst>.

## 6 **Simulation study**

7 We assessed the performance of the location and scale tests as well as the joint location-and-  
8 scale tests with both binary and continuous exposures in a simulation study. We assessed the  
9 performance of OLS regression, Bartlett's test (for simulations with a binary exposure),  
10 Brown-Forsythe test, LRT comparing mixed models with and without a variability effect  
11 (LRTv), JLSsc, JLSp, LRTmv and DGLM. For approaches which failed to adequately control  
12 type I error rates, we repeated the tests after applying an inverse normal rank transformation  
13 to the methylation levels. This simulation study was performed based on data from the  
14 Tsaprouni *et al.* study (21), which investigated the relationship between smoking and DNA  
15 methylation (data accessible at NCBI GEO database (22), accession GSE50660).

16 Type I error simulations were performed by randomly generating a binary or continuous  
17 exposure (uncorrelated with mean or variability of any of the methylation levels) and testing  
18 the associations across all CpG sites in Tsaprouni *et al.*. To generate datasets with varying  
19 sample size (100, 500, 1000 and 10 000 samples), samples were randomly sampled with  
20 replacement from the Tsaprouni *et al.* dataset (Supplementary Text). The binary and  
21 categorical exposures were randomly generated using  $Ber(0.5)$  and  $N(5,1)$ , respectively.  
22 Quantile-quantile (QQ) plots were used to assess deviations from normality and detect  
23 outlying test statistics.

1 Power simulations were performed using the same exposure distributions as above and setting  
2 these exposures to affect the mean and variability of methylation. In each simulation replicate,  
3 one CpG was selected at random from the Tsaprouni *et al.* dataset, the mean and standard  
4 deviation of this CpG site were used to set the average methylation and to generate mean and  
5 variability effects (Supplementary Text). The mean and variability effects of the exposure on  
6 methylation were simulated using normal distributions, while the residual error was simulated  
7 to be either normally distributed, heavy-tailed or skewed (Supplementary Text). We also  
8 performed simulations for a categorical exposure with three categories and where we  
9 generated an outlying value (Supplementary Text). Statistical power was calculated as the  
10 proportion of simulation replicates where either the location, scale or joint test had  $p < 1 \times$   
11  $10^{-7}$ . For each simulation scenario, 1000 simulation replicates were performed.

12 The computational time of the extended Brown-Forsythe test and JLSsc were compared to  
13 their equivalent LRTs for 100 000 randomly selected CpGs from the Tsaprouni *et al.* dataset  
14 for the binary and continuous exposures describe above. This analysis was performed using  
15 one core (2.6 GHz; 4GB) on a linux server.

## 16 **Application to offspring gender and gestational age on cord blood DNA** 17 **methylation**

### 18 *Study population*

19 This study used DNA methylation data generated as part of the Avon Longitudinal Study of  
20 Parents and Children (ALSPAC) (23,24). ALSPAC recruited 14 541 pregnant women with  
21 expected delivery dates between April 1991 and December 1992. Of these initial pregnancies,  
22 there were 14 062 live births and 13 988 children who were alive at 1 year of age. Please note  
23 that the study website contains details of all the data that is available through a fully searchable data  
24 dictionary and variable search tool (<http://www.bristol.ac.uk/alspac/researchers/our-data/>). Ethical  
25 approval for the study was obtained from the ALSPAC Ethics and Law Committee and the



1 Local Research Ethics Committees. Informed consent for the use of data collected via  
2 questionnaires and clinics was obtained from participants following the recommendations of  
3 the ALSPAC Ethics and Law Committee at the time. Consent for biological samples has been  
4 collected in accordance with the Human Tissue Act (2004).

5 As part of the Accessible Resource for Integrated Studies (ARIES) project  
6 (<http://www.ariesepigenomics.org.uk>) (25), a sub-sample of 1018 ALSPAC child–mother  
7 pairs had DNA methylation measured. The ARIES participants were selected based on  
8 availability of DNA samples at two time-points for the mother (antenatal and at follow-up  
9 when the offspring was in adolescence) and at three time-points for the offspring (neonatal  
10 from cord blood, childhood (age 7) and adolescence (age 17)).

### 11 ***Laboratory methods, quality control and pre-processing***

12 The laboratory methods and quality control procedures used have been described elsewhere  
13 (26). In brief, the DNA methylation wet laboratory and pre-processing analyses were  
14 performed at the University of Bristol as part of the ARIES project, where the Infinium  
15 HumanMethylation450 BeadChip (27) was used to measure genome-wide DNA methylation  
16 levels at over 485 000 CpG sites. The methylation level at each CpG site was calculated as a  
17 beta value: the ratio of the methylated probe intensity and the overall intensity. These beta  
18 values range from 0 (no methylation) to 1 (complete methylation). The samples were  
19 processed using functional normalization with the meffil package (28,29). Further quality  
20 control procedures are described in the Supplementary Text.

### 21 ***Statistical analysis***

22 To investigate the mean and variability effects of gender and gestational age (in weeks,  
23 Supplementary Text) on cord blood methylation, we used the approaches which controlled  
24 type I error rates without transforming methylation levels, namely OLS regression, the

1 Brown-Forsythe test, JLSp and JLSsc. All analyses were adjusted for cell counts estimated  
2 using the method described by de Goede *et al.* for cord blood methylation (30). We further  
3 adjusted for 20 surrogate variables to account for residual batch effects (31). The gestational  
4 age analysis was further adjusted for offspring gender and whether the birth was by caesarean  
5 section as well as for maternal characteristics: age, smoking, pre-pregnancy BMI and weight,  
6 parity, education, family social class and alcohol intake during pregnancy. CpGs were  
7 considered to be associated with either gender or gestational age if one of the location, scale  
8 or joint tests had  $p < 1 \times 10^{-7}$ .

9 All analyses were performed using R (version 3.5.2).

## 10 **Results**

### 11 **Simulation study**

12 OLS regression test of mean differences was not inflated under the null of no mean or  
13 variability effect even in 100 samples (Figures 1a and S1). Similarly, the Brown-Forsythe  
14 variability test accurately controlled type I error rates (Figures 1b and S2). Bartlett's test and  
15 LRTv had extreme type I error inflation due to the deviations from normality and the  
16 existence of outlying values in methylation levels (Figure S3). Likewise, the test statistics  
17 from the likelihood-based approaches for joint testing the mean and variability (LRTmv and  
18 DGLM) were also heavily inflated (Figure S3). The extreme inflated type I error rates of these  
19 approaches were no longer present after transforming methylation levels using an inverse  
20 normal rank transformation (Figure S4). However, when using this transformation a mean  
21 effect can induce a variability effect and vice versa (Figure S5), as seen previously (32). JLSp  
22 fared better than the aforementioned joint tests in controlling type I error rates, although the  
23 non-independence of the  $p$ -values did lead to a small amount of type I error inflation (Figure

1 1c and Figure S6). The JLSsc approach, on the other hand, correctly controlled type I error  
2 rates (Figure 1d and Figure S6).

3 In the power simulations, when there was either a mean or variability effect and the  
4 underlying data were normally distributed, the Brown-Forsythe test and JLSsc were less  
5 powerful but still performed well in comparison to the equivalent LRT and the alternative  
6 approaches (Figure 2). This is expected as the Brown-Forsythe test and JLSsc sacrifice a  
7 small amount of power under the normal model for robustness to deviations from this model.  
8 Broadly similar results were found when the residual error was heavy-tailed or skewed, when  
9 the exposure was a categorical variable with three categories and when there was an outlier in  
10 the dataset (Figures S7-S10).

11 The computational time required to complete each approach for 100 000 CpGs with a binary  
12 exposure were as follows: 22 minutes for the extended Brown-Forsythe test, 113 minutes for  
13 LRTv, 16 minutes for JLSsc and 123 minutes for LRTmv. The relative computation times  
14 between the respective variability and joint tests were even greater when the exposure was  
15 continuous.

## 16 **Application to gender and gestational age to**

17 In ARIES, 858 children (417 male and 441 female) were available for the analysis of gender,  
18 and after excluding offspring with missing maternal information we were left with 708  
19 children (345 males and 363 females) for the analysis of gestational age (mean: 39.5 weeks,  
20 standard deviation: 1.5 weeks; Table S1).

21 Methylation at 8174 CpG sites were associated with gender in cord blood (through the mean,  
22 variability or joint tests; Figure 3a and Table S2). Most of these sites were identified through  
23 a mean difference in methylation of males and females (7642 CpGs had a mean difference  
24 with  $p < 1 \times 10^{-7}$ ), although 240 CpG sites were associated with a variability difference

1 between males and females. For instance, cg18918831 was more variable in males compared  
2 to females (Figure 4a). The joint location-and-scale tests identified 7724 of these CpG sites  
3 (JLSp identified 7213 sites and JLSsc identified 7228 sites), including all of those with a  
4 variability effect. Mean methylation at 5359 of these sites were associated with gender in  
5 previous EWAS (Table S2) (33-36).

6 Gestational age was associated with cord blood methylation at 412 CpG sites (Figure 3b and  
7 Table S3). Most of these CpG sites were associated with a mean effect of gestational age on  
8 methylation, and there were no CpG sites with a variability effect with  $p < 1 \times 10^{-7}$ . The  
9 joint mean and variability tests identified 93.7% of the CpG site associations (JLSp identified  
10 317 and JLSsc identified 340 CpG sites, respectively), including sites that were mostly  
11 identified through a variability association (e.g. cg24577594; Table S3). The majority of the  
12 CpG sites identified have been found previously in EWAS of gestational age (402 CpG sites;  
13 Table S3) (36,37).

## 14 **Discussion**

15 In this study, we have introduced a framework for testing variability using an extended  
16 version of the Brown-Forsythe test and for jointly testing mean and variability. These  
17 approaches were compared to the LRTs as well as other alternative methods in simulations  
18 and were used to investigate the effect of gender and gestational age on cord blood DNA  
19 methylation.

20 Without transforming the methylation levels to be normally distributed, the approaches which  
21 assume normality of the phenotype (Bartlett's test, LRTv, LRTmv and DGLM) had extremely  
22 inflated type I error rates when faced with real methylation data. Indeed, these approaches  
23 essentially became tests of deviations from normality and outlying values, which can have  
24 some utility in identifying outliers caused by disease (38). However, because of these

1 drawbacks these approaches are not useful for assessing variability nor joint mean and  
2 variability effects, especially as normalizing outcome levels to overcome this problem can  
3 induce effects that were not present prior to the transformation (32). The extended Brown-  
4 Forsythe test and the JLSsc approach retained correct type I error rates and performed well in  
5 comparison to the other approaches in detecting variability and joint effects. These tests were  
6 also at least 5 times more efficient than their LRT counterparts.

7 Over 8000 CpG sites were associated with gender in cord blood methylation, while  
8 methylation at 412 CpG sites were associated with gestational age. The majority of these CpG  
9 sites were associated with effects of gender and gestational age on mean methylation.  
10 However, 240 CpG sites were associated with differences in variability between males and  
11 females. JLSsc identified most of the associations in both analyses, except where there was  
12 little evidence of a mean/variability effect in the presence of a borderline effect of the other.

13 These methods are applicable to any area of medical research where variability and joint  
14 effects are of interest, although they will be particularly useful for analysing high-dimensional  
15 phenotypes where it is not possible to assess the distribution at all markers. For instance, there  
16 has been recent interest in using variability tests to attempt to identify gene-environment  
17 interactions, as these interactions will often cause heterogeneity in the variance across  
18 genotypes (4,32). The Brown-Forsythe test has been proposed as a useful test in this scenario  
19 (32), although the extended version presented here and elsewhere (10,11) could be used to  
20 assess variability trends across genotypes. Furthermore, JLSsc avoids the distributional  
21 assumptions made by current methods proposed in the genetics literature (4,10,11).

22 The limitations of this study also warrant consideration. In the simulations and the applied  
23 example, only categorical variables with two-levels were assessed in detail, although we fully  
24 expect these results to reasonably extend to categorical variables with many categories. The  
25 application of the approaches to detect CpG sites associated with gender and gestational age

1 also have several limitations, especially with regards to residual confounding. In particular,  
2 there are likely to be other important maternal factors involved in gestation period that we  
3 have not adjusted for in our analysis. The ARIES cohort is also not selected at random from  
4 the full ALSPAC cohort (25), and as such, the results from this study may not generalise to  
5 the full ALSPAC cohort or the general population.

6 In summary, the extended Brown-Forsythe test and JLSsc are robust tests of variability and  
7 joint mean and variability effects, respectively. These tests can be used in analyses to detect  
8 associations for any type of exposure with high-dimensional phenotypes.

## 9 **Funding**

10 This work was supported by an MRC Methodology Research Grant [grant number  
11 MR/M025020/1]. Work was performed in the MRC Integrative Epidemiology Unit [grant  
12 numbers MC\_UU\_12013/3, MC\_UU\_12013/8 and MC\_UU\_12013/9]. The UK Medical  
13 Research Council and Wellcome [grant number 102215/2/13/2] and the University of Bristol  
14 provide core support for ALSPAC. A comprehensive list of grants funding is available on the  
15 ALSPAC website ([http://www.bristol.ac.uk/alspac/external/documents/grant-  
16 acknowledgements.pdf](http://www.bristol.ac.uk/alspac/external/documents/grant-acknowledgements.pdf)); this research was specifically funded by BBSRC [grant numbers  
17 BBI025751/1 and BB/I025263/1], MRC [grant numbers MC\_UU\_12013/1,  
18 MC\_UU\_12013/2 and MC\_UU\_12013/8], National Institute of Child and Human  
19 Development [grant number R01HD068437], NIH [grant number 5R01AI121226-02] and  
20 CONTAMED EU collaborative Project [grant number 212502]. This publication is the work  
21 of the authors and Kate Tilling will serve as the guarantor for the contents of this paper.

## 22 **Acknowledgements**

23 We are extremely grateful to all the families who took part in this study, the midwives for  
24 their help in recruiting them, and the whole ALSPAC team, which includes interviewers,

1 computer and laboratory technicians, clerical workers, research scientists, volunteers,  
2 managers, receptionists and nurses.

### 3 **References**

- 4 1. Feinberg AP, Irizarry RA. Evolution in health and medicine Sackler colloquium:  
5 Stochastic epigenetic variation as a driving force of development, evolutionary adaptation,  
6 and disease. *Proc Natl Acad Sci U S A*. 2010; 107 Suppl 1:1757-64.
- 7 2. Kitano H. Biological robustness. *Nat Rev Genet*. 2004; 5:826-37.
- 8 3. Ek WE, Rask-Andersen M, Karlsson T, Enroth S, Gyllensten U, Johansson A. Genetic  
9 variants influencing phenotypic variance heterogeneity. *Hum Mol Genet*. 2018; 27:799-810.
- 10 4. Young AI, Wauthier FL, Donnelly P. Identifying loci affecting trait variability and  
11 detecting interactions in genome-wide association studies. *Nat Genet*. 2018; 50:1608-14.
- 12 5. Flanagan JM. Epigenome-wide association studies (EWAS): past, present, and future.  
13 *Methods Mol Biol*. 2015; 1238:51-63.
- 14 6. Paul DS, Beck S. Advances in epigenome-wide association studies for common  
15 diseases. *Trends Mol Med*. 2014; 20:541-3.
- 16 7. Conover WJ, Johnson ME, Johnson MM. A Comparative-Study of Tests for  
17 Homogeneity of Variances, with Applications to the Outer Continental-Shelf Bidding Data.  
18 *Technometrics*. 1981; 23:351-61.
- 19 8. Li X, Qiu W, Morrow J, *et al*. A Comparative Study of Tests for Homogeneity of  
20 Variances with Application to DNA Methylation Data. *PLoS One*. 2015; 10:e0145295.
- 21 9. Brown MB, Forsythe AB. Robust Tests for Equality of Variances. *J Am Stat Assoc*.  
22 1974; 69:364-7.

- 1 10. Soave D, Corvol H, Panjwani N, *et al.* A Joint Location-Scale Test Improves Power to  
2 Detect Associated SNPs, Gene Sets, and Pathways. *Am J Hum Genet.* 2015; 97:125-38.
- 3 11. Soave D, Sun L. A generalized Levene's scale test for variance heterogeneity in the  
4 presence of sample correlation and group uncertainty. *Biometrics.* 2017; 73:960-71.
- 5 12. Ahn S, Wang T. A powerful statistical method for identifying differentially  
6 methylated markers in complex diseases. *Pac Symp Biocomput.* 2013:69-79.
- 7 13. Cao Y, Wei P, Bailey M, Kauwe JSK, Maxwell TJ. A versatile omnibus test for  
8 detecting mean and variance heterogeneity. *Genet Epidemiol.* 2014; 38:51-9.
- 9 14. Smyth GK. Generalized Linear-Models with Varying Dispersion. *J Roy Stat Soc B*  
10 *Met.* 1989; 51:47-60.
- 11 15. Li X, Fu Y, Wang X, Qiu W. Robust joint score tests in the application of DNA  
12 methylation data analysis. *BMC Bioinformatics.* 2018; 19:174.
- 13 16. Bartlett MS. Properties of sufficiency and statistical tests. *Proc R Soc Lon Ser-A.*  
14 1937; 160:0268-82.
- 15 17. Teschendorff AE, Widschwendter M. Differential variability improves the  
16 identification of cancer risk markers in DNA methylation studies profiling precursor cancer  
17 lesions. *Bioinformatics.* 2012; 28:1487-94.
- 18 18. Glejser H. A New Test for Heteroskedasticity. *J Am Stat Assoc.* 1969; 64:316-23.
- 19 19. Breusch TS, Pagan AR. A simple test for heteroscedasticity and random coefficient  
20 variation. *Econometrica.* 47:1287-94.
- 21 20. Goldstein H. *Multilevel statistical models.* 4th ed. Chichester, West Sussex: Wiley,  
22 2011.



- 1 21. Tsaprouni LG, Yang TP, Bell J, *et al.* Cigarette smoking reduces DNA methylation  
2 levels at multiple genomic loci but the effect is partially reversible upon cessation.  
3 *Epigenetics*. 2014; 9:1382-96.
- 4 22. Edgar R, Domrachev M, Lash AE. Gene Expression Omnibus: NCBI gene expression  
5 and hybridization array data repository. *Nucleic Acids Res*. 2002; 30:207-10.
- 6 23. Fraser A, Macdonald-Wallis C, Tilling K, *et al.* Cohort Profile: the Avon Longitudinal  
7 Study of Parents and Children: ALSPAC mothers cohort. *Int J Epidemiol*. 2013; 42:97-110.
- 8 24. Boyd A, Golding J, Macleod J, *et al.* Cohort Profile: the 'children of the 90s'--the  
9 index offspring of the Avon Longitudinal Study of Parents and Children. *Int J Epidemiol*.  
10 2013; 42:111-27.
- 11 25. Relton CL, Gaunt T, McArdle W, *et al.* Data Resource Profile: Accessible Resource  
12 for Integrated Epigenomic Studies (ARIES). *Int J Epidemiol*. 2015; 44:1181-90.
- 13 26. Richmond RC, Simpkin AJ, Woodward G, *et al.* Prenatal exposure to maternal  
14 smoking and offspring DNA methylation across the lifecourse: findings from the Avon  
15 Longitudinal Study of Parents and Children (ALSPAC). *Hum Mol Genet*. 2015; 24:2201-17.
- 16 27. Dedeurwaerder S, Defrance M, Calonne E, Denis H, Sotiriou C, Fuks F. Evaluation of  
17 the Infinium Methylation 450K technology. *Epigenomics*. 2011; 3:771-84.
- 18 28. Fortin JP, Labbe A, Lemire M, *et al.* Functional normalization of 450k methylation  
19 array data improves replication in large cancer studies. *Genome Biol*. 2014; 15:503.
- 20 29. Min J, Hemani G, Davey Smith G, Relton CL, Suderman M. Meffil: efficient  
21 normalisation and analysis of very large DNA methylation samples. *bioRxiv*. 2017.

- 1 30. de Goede OM, Razzaghian HR, Price EM, *et al.* Nucleated red blood cells impact  
2 DNA methylation and expression analyses of cord blood hematopoietic cells. *Clin*  
3 *Epigenetics*. 2015; 7:95.
- 4 31. Leek JT, Storey JD. Capturing heterogeneity in gene expression studies by surrogate  
5 variable analysis. *PLoS Genet*. 2007; 3:1724-35.
- 6 32. Wang H, Zhang F, Zeng J, *et al.* Genotype-by-environment interactions inferred from  
7 genetic effects on phenotypic variability in the UK Biobank. *bioRxiv*. 2019.
- 8 33. Shah S, McRae AF, Marioni RE, *et al.* Genetic and environmental exposures constrain  
9 epigenetic drift over the human life course. *Genome Res*. 2014; 24:1725-33.
- 10 34. Yousefi P, Huen K, Dave V, Barcellos L, Eskenazi B, Holland N. Sex differences in  
11 DNA methylation assessed by 450 K BeadChip in newborns. *BMC Genomics*. 2015; 16:911.
- 12 35. Singmann P, Shem-Tov D, Wahl S, *et al.* Characterization of whole-genome  
13 autosomal differences of DNA methylation between men and women. *Epigenetics Chromatin*.  
14 2015; 8:43.
- 15 36. Spiers H, Hannon E, Schalkwyk LC, *et al.* Methylomic trajectories across human fetal  
16 brain development. *Genome Res*. 2015; 25:338-52.
- 17 37. Bohlin J, Haberg SE, Magnus P, *et al.* Prediction of gestational age based on genome-  
18 wide differentially methylated regions. *Genome Biol*. 2016; 17:207.
- 19 38. Teschendorff AE, Jones A, Widschwendter M. Stochastic epigenetic outliers can  
20 define field defects in cancer. *BMC Bioinformatics*. 2016; 17:178.

21

## Figures

Figure 1: QQ plots for type I error simulations using a binary exposure and 1 000 samples. a, OLS (mean test); b, Brown-Forsythe (variability test); c, JLSp (joint test); and d, JLSsc (joint test).

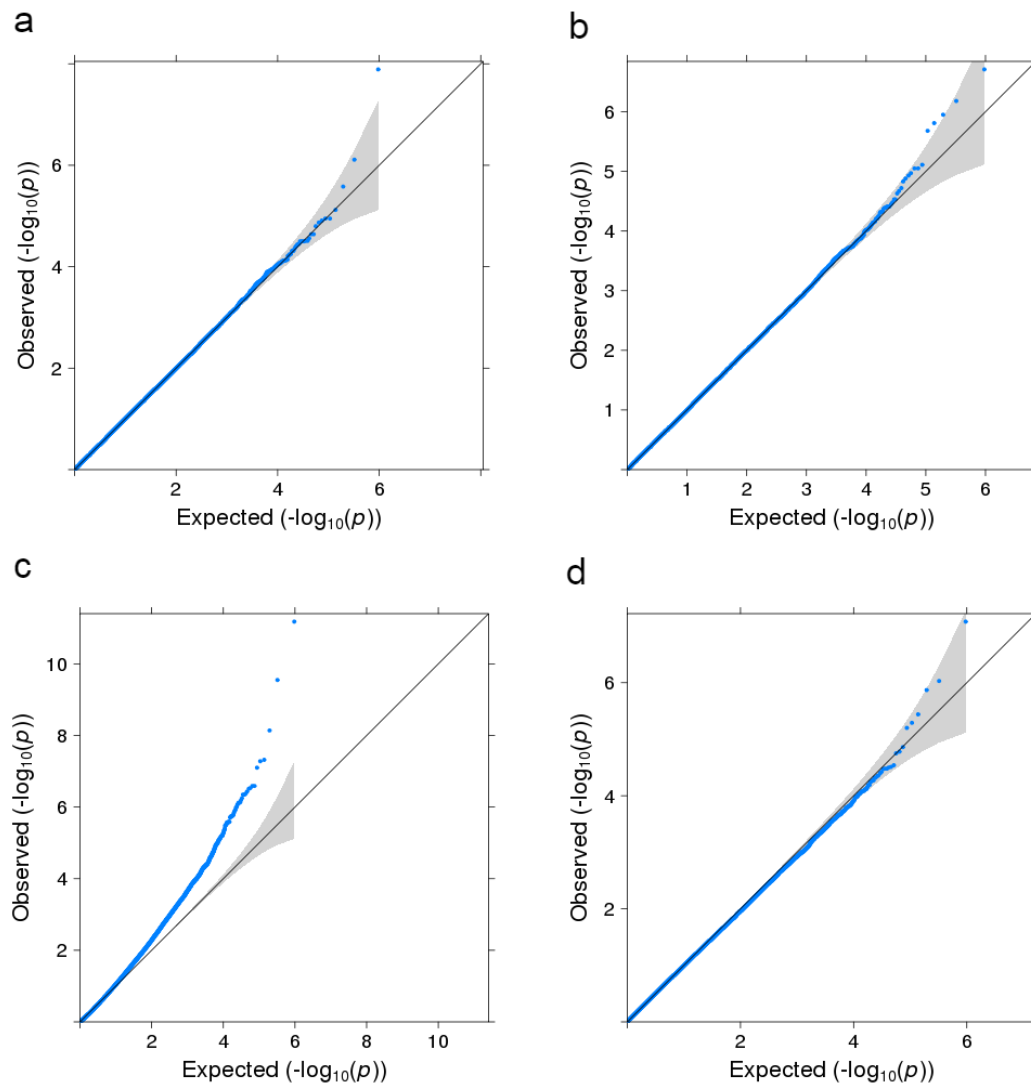

Figure 2: Power simulation results comparing approaches for identifying CpG sites associated with either a mean and/or a variance effect with the exposure at  $p < 1 \times 10^{-7}$ . a and b are plots for a binary exposure and c and d are plots for a continuous exposure.

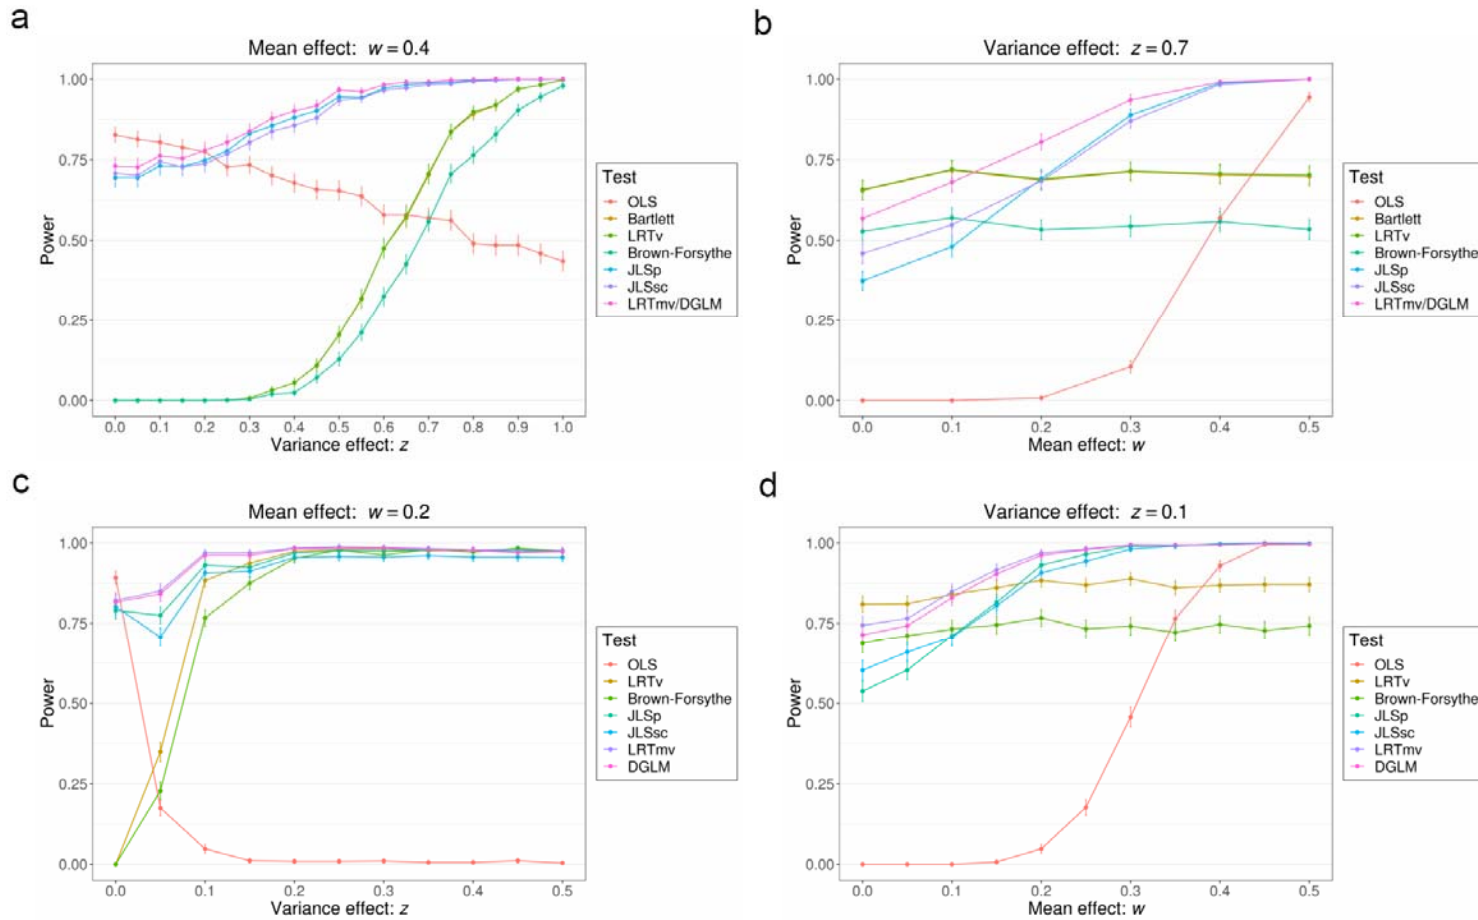

Figure 3: Miami plots for the mean (OLS) and variability (Brown-Forsythe test) associations of methylation with gender (a) and gestational age (b). The dark red and blue lines represent the  $p < 1 \times 10^{-7}$  threshold and the orange points are CpG sites that are associated with a variance effect.

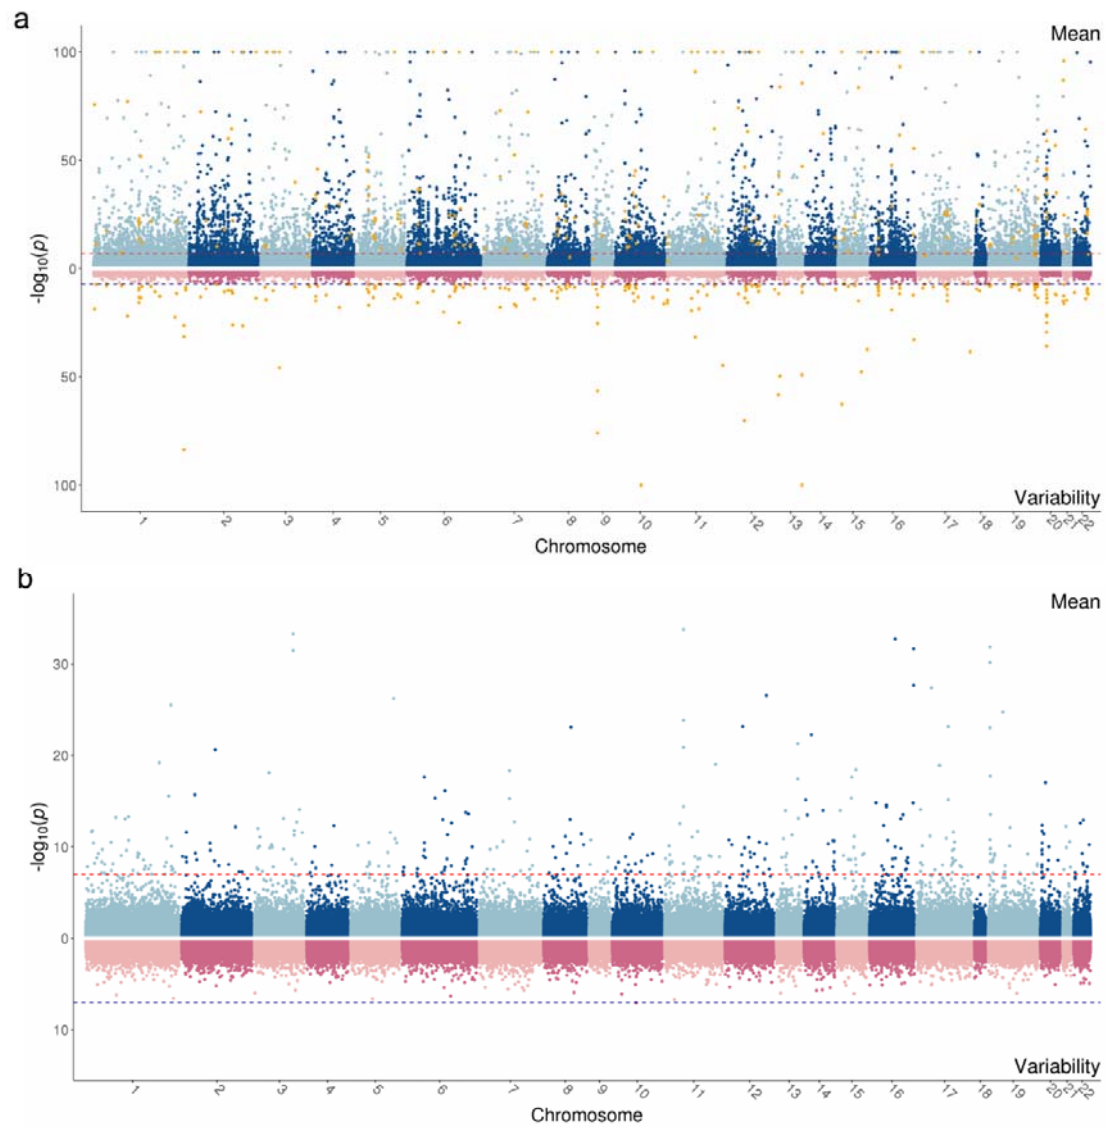

Figure 4: Methylation variability plot for gender.

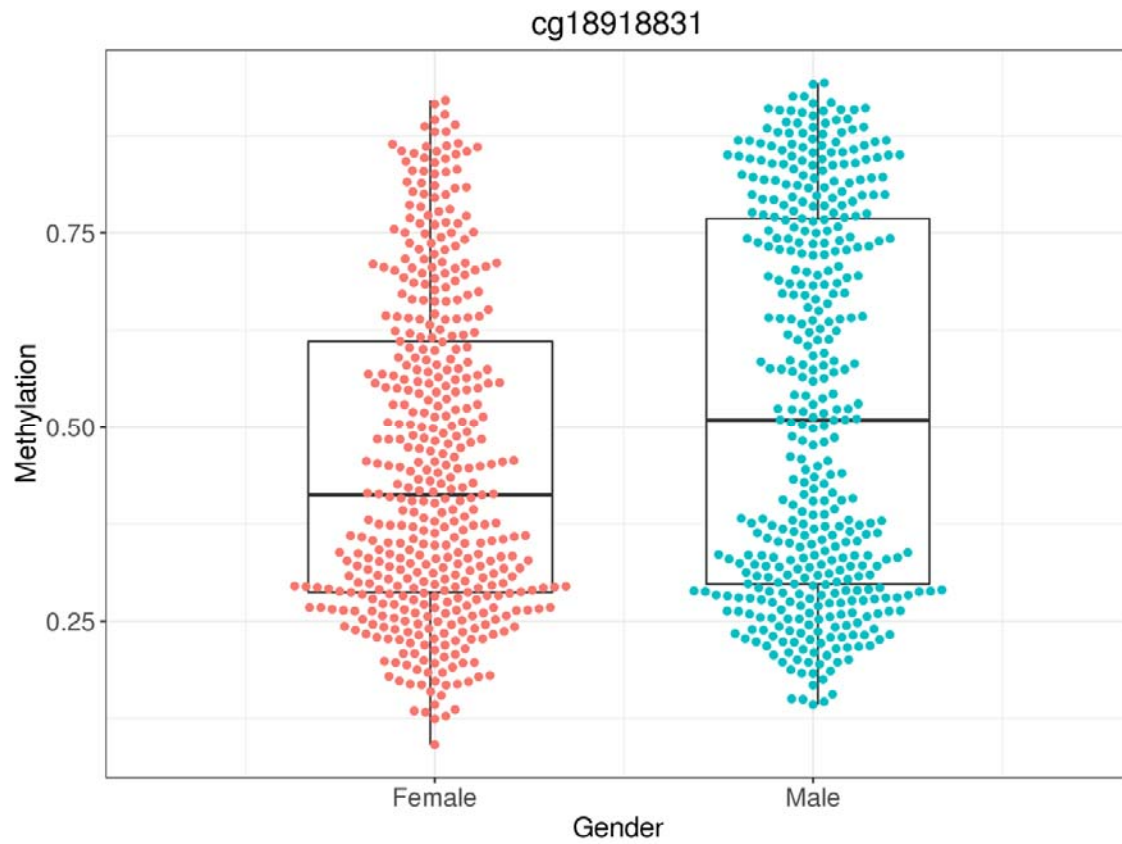

Source: https://www.biorxiv.org/content/10.1101/2020.02.06.926584v1.full.pdf
